# Supplementary material for: The expansion of native poisonous plant patches enhances soil microbial diversity in alpine meadows of the Qinghai-Tibet Plateau by mediating soil resource heterogeneity
Source: Research Square preprint supplement (doi:10.21203/rs.3.rs-8600857/v1), 2026-01-23
Supplement: Supplementary file 1 [file 286f4882eb5f32187cb2f1ac.docx]

**Title:** **The expansion of native poisonous plant patches enhances soil microbial diversity in alpine meadows of the Qinghai-Tibet Plateau by mediating soil resource heterogeneity**

Author List:

**Jianchao Song 1, 2**,

College of Grassland Science, Gansu Agricultural University, Lanzhou, Gansu 730070, China

1339801334@qq.com

**Doudou Lin 1, 2**,

College of Grassland Science, Gansu Agricultural University, Lanzhou, Gansu 730070, China

1843118097@qq.com

**Xiaojun Yu 1, 2 ***,

College of Grassland Science, Gansu Agricultural University, Lanzhou, Gansu 730070, China

[yuxj@gsau.edu.cn](mailto:yuxj@gsau.edu.cn)

**An Yang 1, 2**,

College of Grassland Science, Gansu Agricultural University, Lanzhou, Gansu 730070, China

[1806492576@qq.com](mailto:1806492576@qq.com)

**Hang Yang 1, 2**,

College of Grassland Science, Gansu Agricultural University, Lanzhou, Gansu 730070, China

yhang_gsau@163.com

**Xiaojuan Zhang**

College of Grassland Science, Gansu Agricultural University, Lanzhou, Gansu 730070, China

[2187245022@qq.com](mailto:2187245022@qq.com)

1 College of Grassland Science, Gansu Agricultural University, Lanzhou, Gansu 730070, China

2 Key Laboratory of Forage Germplasm Innovation and New Variety Breeding of Ministry of Agriculture and Rural Affairs (Co-sponsored by Ministry and Province), Key Laboratory of Grassland Ecosystem of Ministry of Education, Pratacultural Engineering Laboratory of Gansu Province, Sino-U.S. Center for Grassland Ecosystem Sustainability, Lanzhou, Gansu 730070, China

***Corresponding Author:**

**Xiaojun Yu**,

College of Grassland Science, Gansu Agricultural University, Lanzhou, Gansu 730070, China

Email: [yuxj@gsau.edu.cn](mailto:yuxj@gsau.edu.cn)

**Table S1** The sampling design and vegetation characteristics of the *Ligularia* *virgaurea* patches

| Treatments | *Ligularia virgaurea* density  ind·0.25 m-2 | Dominant plant species |
| --- | --- | --- |
| CK | 0 | *Carex alatauensis*, *Carex capillifolia*, *Elymus nutans*, *Stipa aliena*, *Gentiana straminea* |
| LD | 20-30 | *Carex alatauensis*, *Carex capillifolia*, *Elymus nutans*, *Ligularia virgaurea*, *Stipa aliena* |
| MD | 45-65 | *Ligularia virgaurea*, *Elymus nutans*, *Carex alatauensis*, *Carex capillifolia*, *Gentiana straminea* |
| HD | 75-100 | *Ligularia virgaurea*, *Elymus nutans*, *Carex alatauensis*, *Carex capillifolia*, *Gentiana straminea* |

CK, LD, MD and HD represent non-patch, low-density, medium-density and high-density *Ligularia* *virgaurea* patches in grassland, respectively.

**
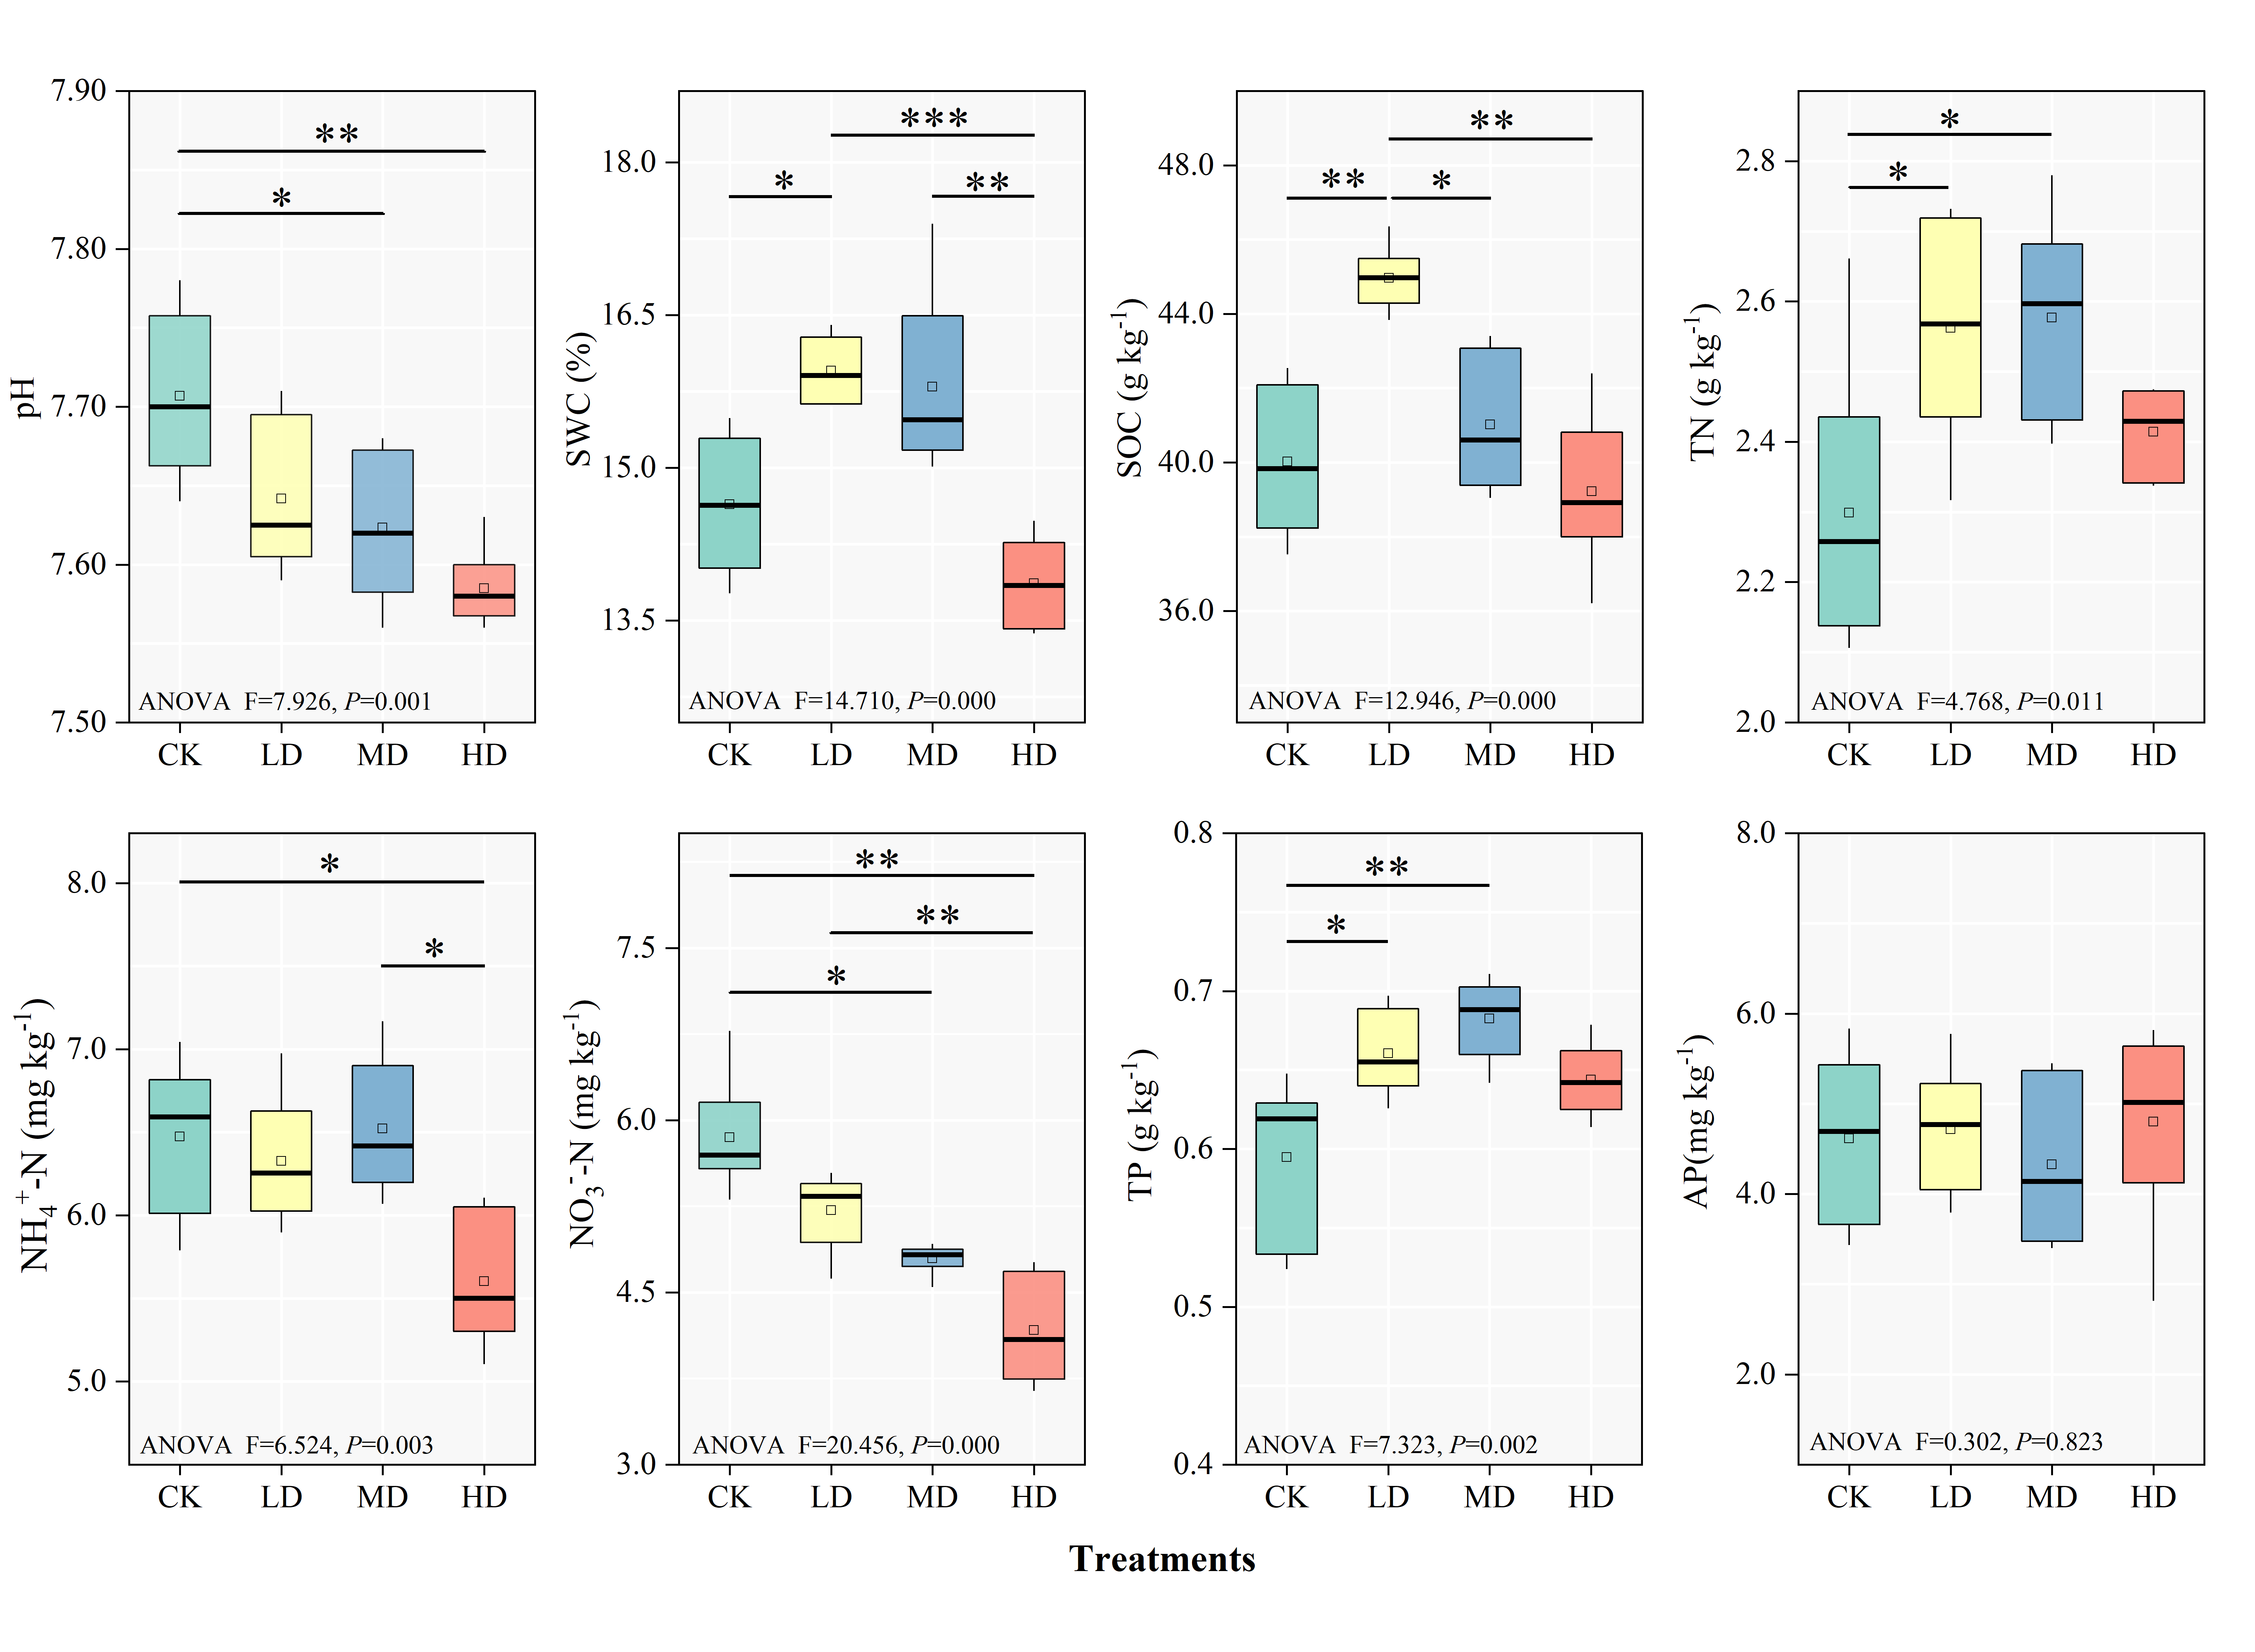
Fig. S1** Changes in soil physico-chemical properties under different density of *Ligularia virgaurea* patches. CK, LD, MD and HD represent non-patch, low-density, medium-density and high-density *L*. *virgaurea* patches in grassland, respectively. Different lowercase letters indicate significant differences between treatments at *P* <0.05.

**
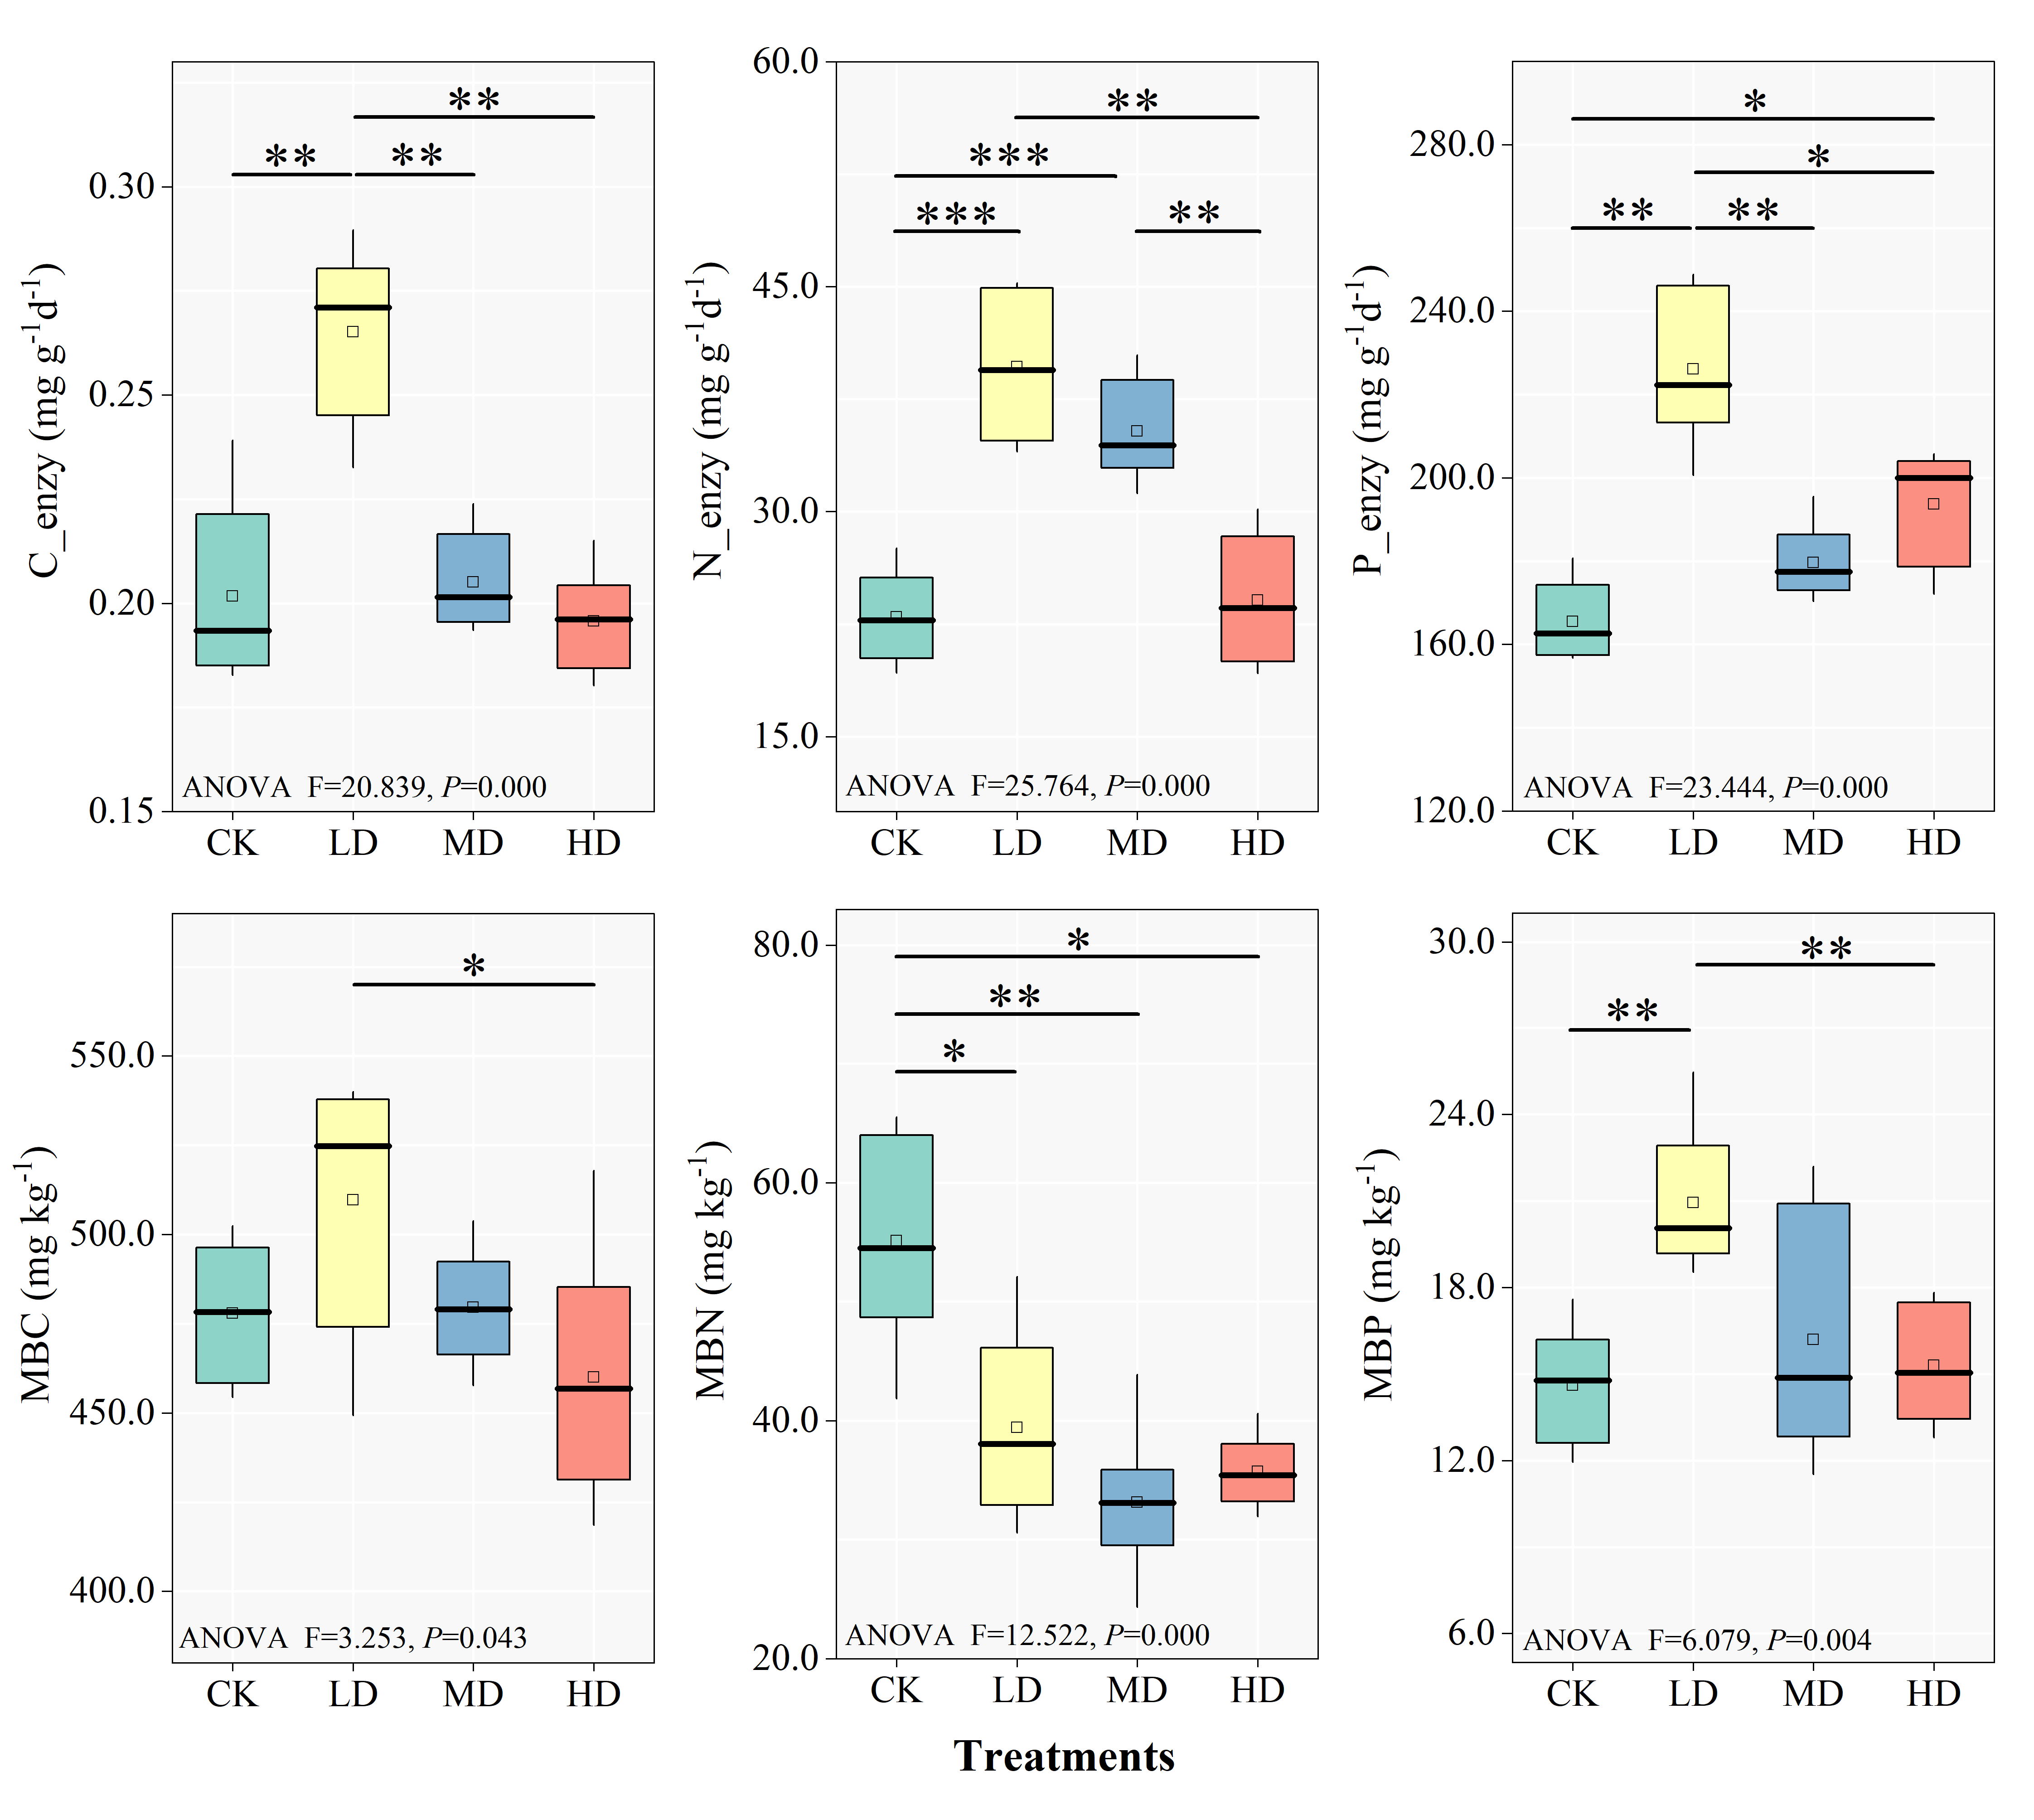
Fig. S2** Changes in soil enzyme activities and microbial biomass under different density of *L*. *virgaurea* patches. CK, LD, MD and HD represent non-patch, low-density, medium-density and high-density *L*. *virgaurea* patches in grassland, respectively. Different lowercase letters indicate significant differences between treatments at *P* <0.05.

**
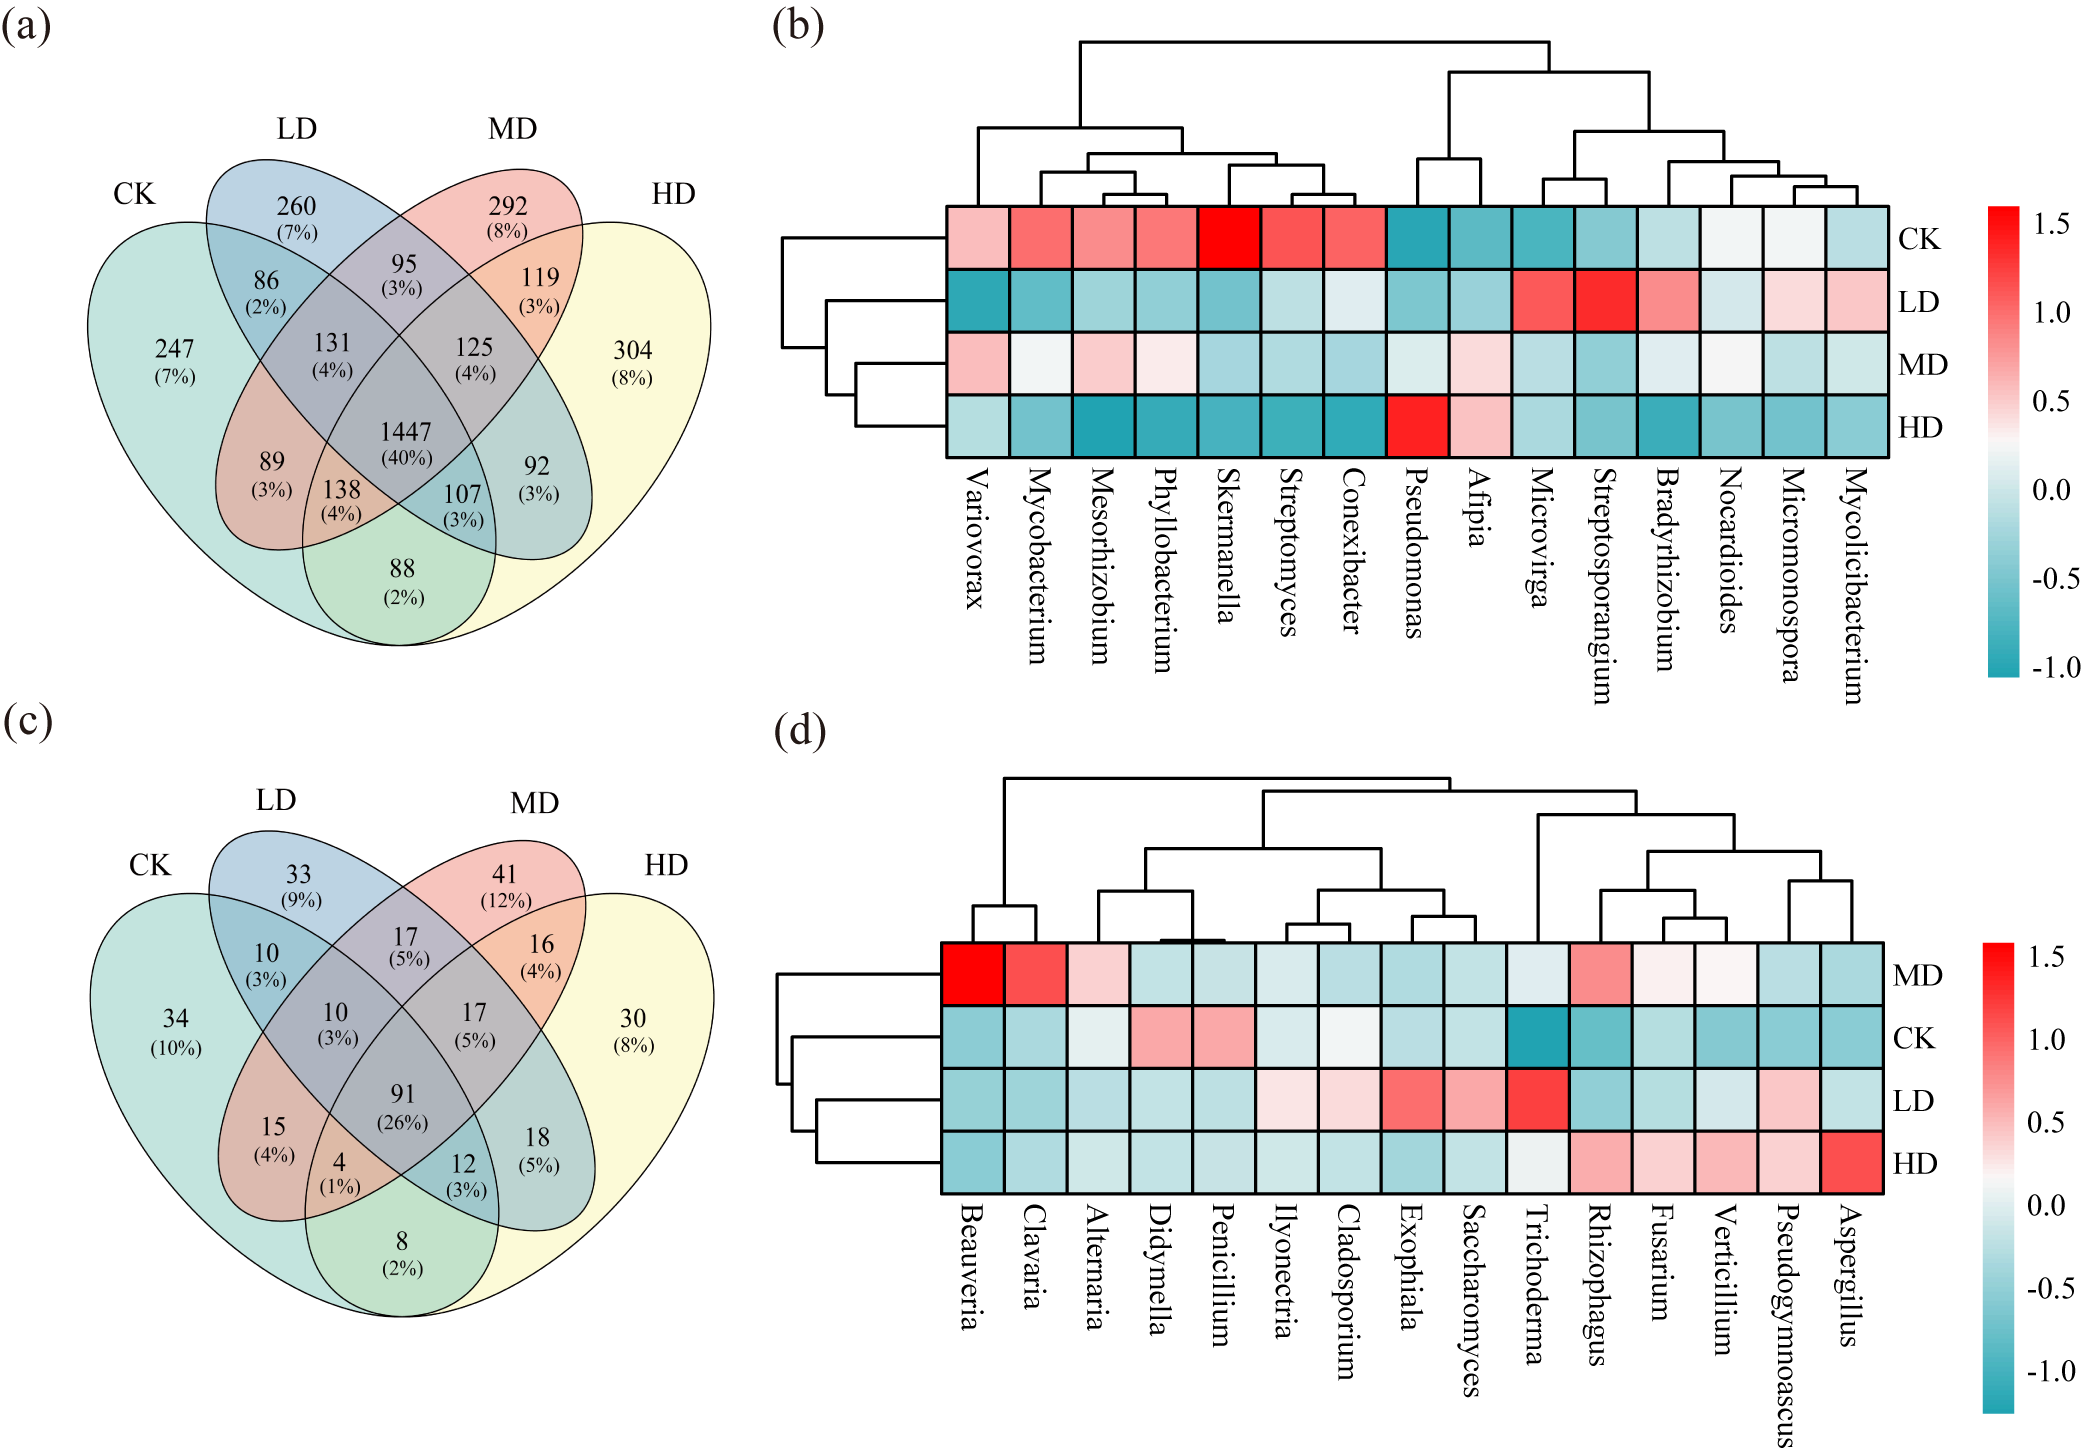
Fig. S3** Venn diagrams and cluster heatmap of bacterial (a, b) and fungal (c, d) communities under different density of *L*. *virgaurea* patches. CK, LD, MD and HD represent non-patch, low-density, medium-density and high-density *L*. *virgaurea* patches in grassland, respectively.

**Table S2** Topological properties of bacterial and fungal networks in grassland patches with different density levels of *L*. *virgaurea*

| Network indexes | Bacterial community | | | | Fungal community | | | |
| --- | --- | --- | --- | --- | --- | --- | --- | --- |
|  | CK | LD | MD | HD | CK | LD | MD | HD |
| Nodes | 135 | 134 | 142 | 137 | 70 | 70 | 71 | 79 |
| Edges | 600 | 559 | 771 | 579 | 113 | 121 | 113 | 135 |
| Average degree | 8.889 | 8.343 | 10.859 | 8.453 | 3.229 | 3.457 | 3.183 | 3.418 |
| Network diameter | 7.000 | 7.000 | 7.000 | 9.000 | 11.000 | 10.000 | 11.000 | 16.000 |
| Modularity | 0.595 | 0.626 | 0.499 | 0.604 | 0.785 | 0.786 | 0.828 | 0.809 |
| Average clustering coefficient | 0.479 | 0.521 | 0.478 | 0.500 | 0.630 | 0.547 | 0.669 | 0.601 |
| Average path length | 3.278 | 3.312 | 3.101 | 3.453 | 4.457 | 4.025 | 4.657 | 5.743 |

CK, LD, MD and HD represent non-patch, low-density, medium-density and high-density *L*. *virgaurea* patches in grassland, respectively.
